# Supplementary material
Source: PubMed Central journal article supplement (PMC7960469)
Supplement: 4816_table.pdf [file 4816_table.pdf]

**On-line Table: Patient demographics, genetics, and clinical scoring results**

| Patient <sup>a</sup> | Age (yr) | Sex | Mutation 1  | Mutation 2 | Putative Amino Acid Change 1   | Putative Amino Acid Change 2   | Motor Score | Visual Score | Language Score |          |                                |           |   |   |   |
|----------------------|----------|-----|-------------|------------|--------------------------------|--------------------------------|-------------|--------------|----------------|----------|--------------------------------|-----------|---|---|---|
| 065-1                | 8.8      | F   | c.622C>T    | c.509-1G>C | p.Arg208X                      | Intron mutation, splice defect | 0           | 0            | 0              |          |                                |           |   |   |   |
| 455-1                | 3.5      | M   | c.509-1G>C  | c.622C>T   | Intron mutation, splice defect | p.Arg208X                      | 3           | 3            | 3              |          |                                |           |   |   |   |
| 457-1                | 4.2      | F   | c.1094G>A   | c.1094G>A  | p.Cys365Tyr                    | p.Cys365Tyr                    | 2           | 3            | 2              |          |                                |           |   |   |   |
|                      | 5.2      |     |             |            |                                |                                | 1           | 2            | 0              |          |                                |           |   |   |   |
|                      | 5.8      |     |             |            |                                |                                | 0           | 0            | 0              |          |                                |           |   |   |   |
|                      | 8.6      |     |             |            |                                |                                | 0           | 0            | 0              |          |                                |           |   |   |   |
|                      | 9.3      |     |             |            |                                |                                | 0           | 0            | 0              |          |                                |           |   |   |   |
| 457-2                | 10.3     | F   | c.1094G>A   | c.1094G>A  | p.Cys365Tyr                    | p.Cys365Tyr                    | 0           | 0            | 0              |          |                                |           |   |   |   |
|                      | 5.2      |     |             |            |                                |                                | 1           | 2            | 0              |          |                                |           |   |   |   |
|                      | 5.8      |     |             |            |                                |                                | 0           | 0            | 0              |          |                                |           |   |   |   |
|                      | 8.6      |     |             |            |                                |                                | 0           | 0            | 0              |          |                                |           |   |   |   |
|                      | 9.3      |     |             |            |                                |                                | 0           | 0            | 0              |          |                                |           |   |   |   |
| 467-1                | 10.3     | M   | c.1439T>G   | c.509-1G>C | p.Val480Gly                    | Intron mutation, splice defect | 0           | 0            | 0              |          |                                |           |   |   |   |
|                      | 13.8     |     |             |            |                                |                                | 0           | 0            | 0              |          |                                |           |   |   |   |
|                      | 468-1    |     |             |            |                                |                                | 3.8         | M            | c.509-1G>C     | c.622C>T | Intron mutation, splice defect | p.Arg208X | 2 | 2 | 2 |
|                      | 4.7      |     |             |            |                                |                                | 1           | 1            | 0              |          |                                |           |   |   |   |
|                      | 5.6      |     |             |            |                                |                                | 0           | 0            | 0              |          |                                |           |   |   |   |
| 473-1                | 6.6      | F   | c.311T>A    | c.509-1G>C | p.Leu104X                      | Intron mutation, splice defect | 0           | 0            | 0              |          |                                |           |   |   |   |
|                      | 7.9      |     |             |            |                                |                                | 0           | 0            | 0              |          |                                |           |   |   |   |
|                      | 5.7      |     |             |            |                                |                                | 1           | 3            | 1              |          |                                |           |   |   |   |
|                      | 6.3      |     |             |            |                                |                                | 0           | 0            | 0              |          |                                |           |   |   |   |
|                      | 7.2      |     |             |            |                                |                                | 0           | 0            | 0              |          |                                |           |   |   |   |
| 479-1                | 2.3      | F   | c.622C>T    | c.622C>T   | p.Arg208X                      | p.Arg208X                      | 2           | 2            | 2              |          |                                |           |   |   |   |
|                      | 7.1      | 0   | 1           | 0          |                                |                                |             |              |                |          |                                |           |   |   |   |
| 481-1                | 6.4      | F   | c.622C>T    | c.622C>T   | p.Arg208X                      | p.Arg208X                      | 0           | 0            | 0              |          |                                |           |   |   |   |
| 486-1                | 3.3      | F   | c.509-1G>C  | c.833A>G   | Intron mutation, splice defect |                                | 3           | 3            | 3              |          |                                |           |   |   |   |
| 495-1                | 5.2      | M   | c.380G>A    | c.509-1G>C | p.Arg127Gln                    | Intron mutation, splice defect | 3           | 2            | 2              |          |                                |           |   |   |   |
| 499-1                | 6.5      | M   | c.230-12T>A | c.622C>T   | Intron mutation                | p.Arg208X                      | 0           | 2            | 0              |          |                                |           |   |   |   |
| 532-1                | 3.1      | F   | c.622C>T    | c.622C>T   | p.Arg208X                      | p.Arg208X                      | 3           | 3            | 3              |          |                                |           |   |   |   |

<sup>a</sup> Patients 0457-1 and 0457-2 are identical twins.
